# Supplementary material for: Effects of pH, temperature and shear on the structure–property relationship of lamellar hydrogels from microbial glucolipids probed byin siturheo-SAXS
Source: Royal Society of Chemistry journal article supplement (doi:10.1039/c9sm02494h), 2020-01-01
Supplement: c9sm02494h1.pdf [file c9sm02494h1.pdf]

## Supplementary Information for

### **Effect of pH, Temperature and Shear on the Structure-Property Relationship of Lamellar Hydrogels from Microbial Glucolipids Probed by *in-situ* Rheo-SAXS**

Ghazi Ben Messaoud,<sup>1,†</sup> Patrick Le Griel,<sup>1</sup> Daniel Hermida-Merino,<sup>2</sup> Niki Baccile<sup>1,\*</sup>

<sup>1</sup> Sorbonne Université, Centre National de la Recherche Scientifique, Laboratoire de Chimie de la Matière Condensée de Paris, LCMCP, F-75005 Paris, France

<sup>2</sup> Netherlands Organisation for Scientific Research (NWO), DUBBLE@ESRF BP CS40220, 38043 Grenoble, France

\*Correspondence to: Dr. Niki Baccile, niki.baccile@sorbonne-universite.fr, Phone: 00 33 1 44 27 56 77

† Current address: DWI- Leibniz Institute for Interactive Materials, Forckenbeckstrasse 50, 52056, Aachen, Germany

#### **This PDF file includes:**

Figs. S1 to S2

Video 1 and Video 2 are downloadable at the editor's website.

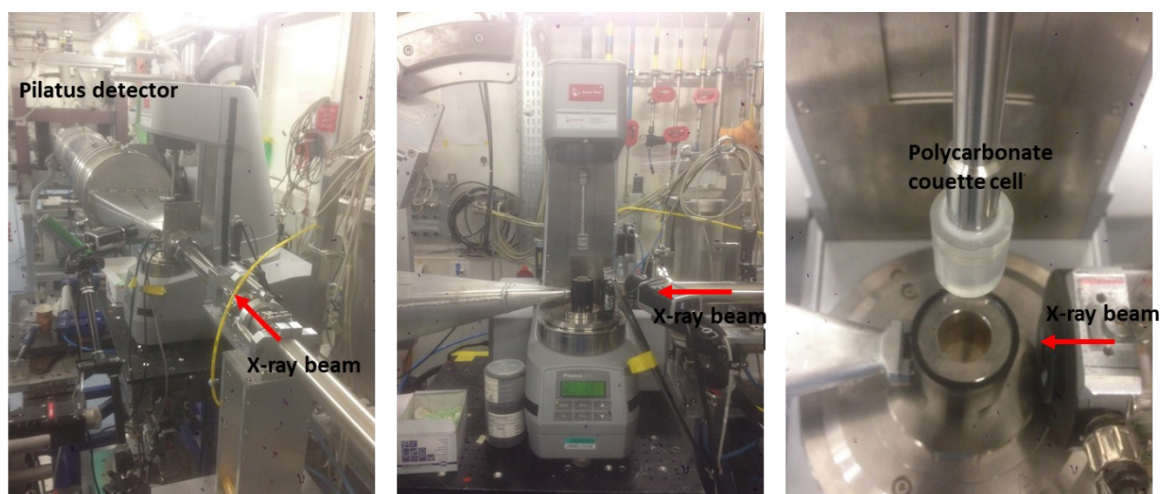

**Figure S 1 – Rheo-SAXS apparatus used at the BM29B beamline at ESRF synchrotron (Grenoble, France). A MCR 501 rheometer (Anton Paar, Graz, Austria) equipped with a Couette polycarbonate cell (imposed gap = 1 mm) is employed. A radial configuration is used during the Rheo-SAXS study.**

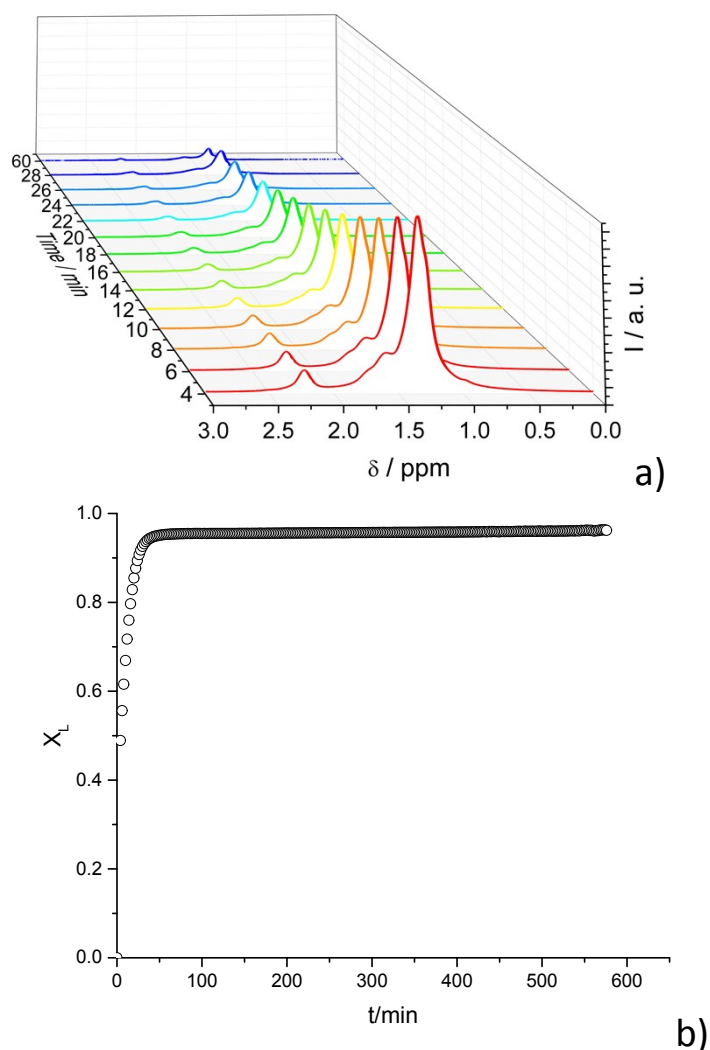

**Figure S 2 – Time-resolved  $^1\text{H}$  solution NMR recorded during the sol-to-gel (micellar-to-lamellar) transition of G-C18:0 glucolipid ( $C_{\text{G-C18:0}} = 5 \text{ wt\%}$ ) upon acidification (initial pH 11,  $[\text{GDL}] = 100 \text{ mM}$ , solvent:  $\text{D}_2\text{O}$ ). a) Plot of the 1D  $^1\text{H}$  NMR spectra in the  $3 < \delta/\text{ppm} < 0$  range within one hour from GD addition. Attribution:  $\alpha\text{-CH}_2$ ,  $\delta_{\text{R-CH}_2\text{CH}_2\text{COOH}} = 2.23 \text{ ppm}$ ;  $\beta\text{-CH}_2$ ,  $\delta_{\text{R-CH}_2\text{CH}_2\text{COOH}} = 1.61 \text{ ppm}$ ; aliphatic chain,  $\delta_{\text{R-CH}_2\text{CH}_2\text{COOH}} = 1.34 \text{ ppm}$ . b) Time evolution of the molar fraction of G-C18:0 glucolipid ( $C_{\text{G-C18:0}} = 5 \text{ wt\%}$ ) in the lamellar phase  $X_L = 1 - X_M$ , where  $X_M$ , the micellar fraction, is obtained by the normalized integral of the  $^1\text{H}$  NMR signal of G-C18:0 in the interval  $3 < \delta/\text{ppm} < 0$ .  $^1\text{H}$  NMR is only sensitive to the compound in the micellar environment.**
